# Supplementary material for: 1H-NMR metabolomic profile of healthy and osteoarthritic canine synovial fluid before and after UC-II supplementation
Source: PubMed Central journal article supplement (PMC9669020; doi:10.1038/s41598-022-23977-1), 2022-11-16
Supplement: 41598_2022_23977_MOESM1_ESM.pdf [file 41598_2022_23977_MOESM1_ESM.pdf]

# <sup>1</sup>H-NMR metabolomic profile of healthy and osteoarthritic canine synovial fluid before and after UC-II supplementation

Marzia Stabile<sup>1,\*,+</sup>, Chiara Roberta Girelli<sup>2,+</sup>, Luca Lacitignola<sup>1</sup>, Rossella Samarelli<sup>3</sup>, Antonio Crovace<sup>1</sup>, Francesco Paolo Fanizzi<sup>2</sup>, and Francesco Staffieri<sup>1</sup>

<sup>1</sup>Section of Veterinary Clinics and Animal Production, Department of Emergency and Organ Transplantation, University of Bari, 70123, Bari, Italy

<sup>2</sup>Department of Biological and Environmental Sciences and Technologies, University of Salento, 73100 Lecce, Italy

<sup>3</sup>Section of Avian Pathology, Department of Veterinary Medicine, University of Bari, 70123, Bari, Italy

\* [marzia.stabile@uniba.it](mailto:marzia.stabile@uniba.it); [Francesco.staffieri@uniba.it](mailto:Francesco.staffieri@uniba.it)

+these authors contributed equally to this work

## Supplementary information

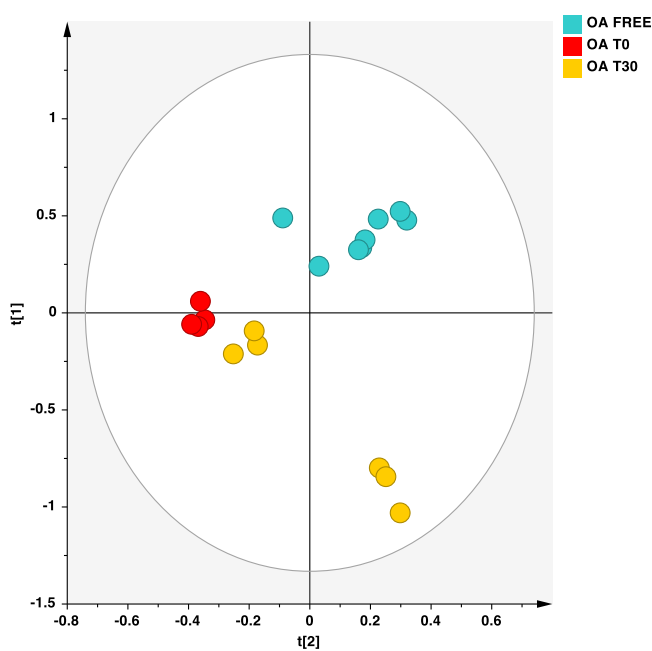

**Figure S1.** PCA t[1]/t[2] scores plot of the whole SF samples data set. Three components give R2X=0.731; Q2= 0.453

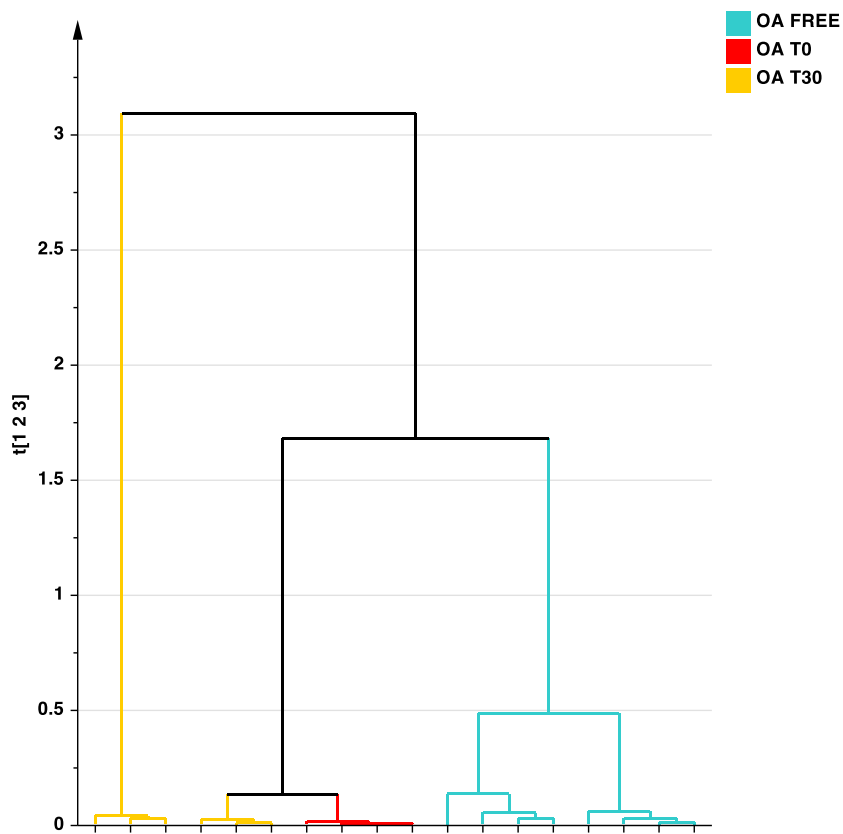

**Figure S2.** HCA dendrogram showing the clusters generated by hierarchical cluster analysis of the whole data set using Ward linkage criterion. Dendrograms are sorted by size.

| <b>Var ID (Primary)</b>              | <b>M17.p(corr)[1]</b> | <b>M17.VIP[1+1+0]</b> |
|--------------------------------------|-----------------------|-----------------------|
| <b>creatine/creatinine (3.9 ppm)</b> | -0.598987             | 2.55625               |
| <b>TMAO (3.26 ppm)</b>               | -0.634953             | 5.13238               |
| <b>citrate (2.7ppm)</b>              | 0.961914              | 1.83663               |
| <b>citrate (2.54 ppm)</b>            | 0.961048              | 1.82662               |
| <b>glutamine (2.1 ppm)</b>           | -0.920607             | 2.73875               |
| <b>β-OH-butyrate (1.18 ppm)</b>      | -0.795191             | 3.02273               |

**Table S1** List of discriminating chemical descriptors (variables) with corresponding correlation coefficient (pcorr), and variable importance on the projection (VIP) for OA-T0 and OA-T30 SF samples OPLS-DA model

| <b>Var ID (Primary)</b>         | <b>M22.p(corr)[1]</b> | <b>M22.VIP[1+1+0]</b> |
|---------------------------------|-----------------------|-----------------------|
| <b>histidine (7.74 ppm)</b>     | -0.870006             | 0.816922              |
| <b>TMAO (3.26 ppm)</b>          | -0.63912              | 4.43003               |
| <b>glutamine (2.1 ppm)</b>      | -0.835927             | 2.67689               |
| <b>alanine (1.5 ppm)</b>        | -0.985323             | 2.41377               |
| <b>β-OH-butyrate (1.18 ppm)</b> | -0.721501             | 2.15177               |
| <b>lactate (1.34 ppm)</b>       | 0.616009              | 5.44766               |
| <b>lipids (0.86 ppm)</b>        | -0.95764              | 2.76259               |

**Table S2** List of discriminating chemical descriptors (variables) with corresponding correlation coefficient (pcorr), and variable importance on the projection (VIP) for OA-FREE and OA- T0 SF samples OPLS-DA model

| <b>Var ID (Primary)</b>     | <b>M37.p(corr)[1]</b> | <b>M37.VIP[1+1+0]</b> |
|-----------------------------|-----------------------|-----------------------|
| <b>α-glucose (5.26 ppm)</b> | -0.923619             | 2.29777               |
| <b>β-glucose (4.66 ppm)</b> | -0.925983             | 2.10316               |
| <b>glutamine (2.1 ppm)</b>  | -0.94806              | 2.33689               |
| <b>alanine (1.5 ppm)</b>    | -0.917508             | 2.24029               |
| <b>lactate (1.34 ppm)</b>   | 0.548916              | 2.96059               |
| <b>lipids (0.86 ppm)</b>    | -0.931488             | 2.26821               |

**Table S3** List of discriminating chemical descriptors (variables) with corresponding correlation coefficient (pcorr), and variable importance on the projection (VIP) for OA-FREE and OA- T30 SF samples OPLS-DA model
